# Supplementary material for: Monitoring the Circulation of SARS-CoV-2 Variants by Genomic Analysis of Wastewater in Marseille, South-East France
Source: MDPI journal article supplement (doi:10.3390/pathogens10081042), 2021-08-17
Supplement: s1 [file s1]

Table S1: Evaluation of efficacy of Bio-T Kit® SARS-CoV-2 UK & N501Y variants (Biosellal, BIOTK125) for the detection of variants

| Anonymous sample name | Ct Gene E | Ct Gene S with N501Y mutation | Ct Gene S with $\Delta 69-70$ deletion | Conclusion Bio-T Kit           | IHU-MI | Classification according to NextClade | WHO label | Pango lineage |
|-----------------------|-----------|-------------------------------|----------------------------------------|--------------------------------|--------|---------------------------------------|-----------|---------------|
| 1                     | 13,0      | NI                            | NI                                     | Other SARS-CoV-2 variants      | 3      | 20B                                   |           | N.2           |
| 2                     | 12,1      | NI                            | NI                                     | Other SARS-CoV-2 variants      | 2098   | 20A                                   |           | B.1.160       |
| 3                     | 13,9      | NI                            | NI                                     | Other SARS-CoV-2 variants      | 669    | 20A                                   |           | B.1.36.10     |
| 4                     | 11,9      | 14,2                          | NI                                     | SA-BR-Marseille N501Y variants | 3191   | 20J (Brazilian)                       | Gamma     | P.1           |
| 5                     | 12,7      | 14,1                          | NI                                     | SA-BR-Marseille N501Y variants | 3368   | 20J (Brazilian)                       | Gamma     | P.1           |
| 6                     | 11,4      | 13,2                          | NI                                     | SA-BR-Marseille N501Y variants | 3217   | 19B (Marseille 501)                   |           | A.27          |
| 7                     | 14,1      | NI                            | NI                                     | Other SARS-CoV-2 variants      | 2128   | 20A.EU2                               |           | B.1.160       |
| 8                     | 13,8      | NI                            | NI                                     | Other SARS-CoV-2 variants      | 3197   | 20A.EU2                               |           | B.1.160       |
| 9                     | 13,3      | NI                            | NI                                     | Other SARS-CoV-2 variants      | 2123   | 20A                                   |           | B.1.416       |
| 10                    | 14,6      | 16,3                          | 15,6                                   | UK variants                    | 3428   | 20I (UK)                              | Alpha     | B.1.1.7       |
| 11                    | 12,7      | NI                            | NI                                     | Other SARS-CoV-2 variants      | 2792   | 20A.EU2                               |           | B.1.160       |
| 12                    | 14,9      | NI                            | NI                                     | Other SARS-CoV-2 variants      | 3203   | 20A.EU2                               |           | B.1.160       |
| 13                    | 13,3      | 15,0                          | 14,6                                   | UK variants                    | 3510   | 20I (UK)                              | Alpha     | B.1.1.7       |
| 14                    | 13,6      | NI                            | NI                                     | Other SARS-CoV-2 variants      | 2096   | 20A.EU2                               |           | B.1.160       |
| 15                    | 14,2      | NI                            | NI                                     | Other SARS-CoV-2 variants      | 3563   | 21D (Marseille484K.V3-21D)            | Eta       | B.1.525       |
| 16                    | 14,2      | NI                            | NI                                     | Other SARS-CoV-2 variants      | 3239   | 20B (Marseille484K.V1-20B)            |           | R.1           |
| 17                    | 14,5      | 16,1                          | NI                                     | SA-BR-Marseille N501Y variants | 3228   | 20H (South African)                   | Beta      | B.1.351       |
| 18                    | 11,7      | NI                            | NI                                     | Other SARS-CoV-2 variants      | 2129   | 20A.EU2                               |           | B.1.160       |
| 19                    | 12,4      | NI                            | NI                                     | Other SARS-CoV-2 variants      | 2137   | 20A                                   |           | B.1.160       |
| 20                    | 12,2      | NI                            | NI                                     | Other SARS-CoV-2 variants      | 845    | 20C                                   |           | B.1           |
| 21                    | 10,8      | 12,7                          | NI                                     | SA-BR-Marseille N501Y variants | 3224   | 19B (Marseille 501)                   |           | A.27          |
| 22                    | 12,5      | NI                            | NI                                     | Other SARS-CoV-2 variants      | 2178   | 20A                                   |           | B.1.416       |
| 23                    | 14,1      | 16,0                          | NI                                     | SA-BR-Marseille N501Y variants | 3227   | 20H (South African)                   | Beta      | B.1.351       |

|    |      |      |      |                                |      |                            |       |         |
|----|------|------|------|--------------------------------|------|----------------------------|-------|---------|
| 24 | 13,4 | NI   | NI   | Other SARS-CoV-2 variants      | 2122 | 20A                        |       | B.1.416 |
| 25 | 14,2 | 15,1 | 15,1 | UK variants                    | 3505 | 20I (UK)                   | Alpha | B.1.1.7 |
| 26 | 12,8 | 14,7 | NI   | SA-BR-Marseille N501Y variants | 3147 | 20H (South African)        | Beta  | B.1.351 |
| 27 | 13,7 | 15,6 | 15,1 | UK variants                    | 3076 | 20I (UK)                   | Alpha | B.1.1.7 |
| 28 | 13,3 | 15,3 | NI   | SA-BR-Marseille N501Y variants | 3242 | 20H (South African)        | Beta  | B.1.351 |
| 29 | 11,3 | NI   | NI   | Other SARS-CoV-2 variants      | 2514 | 20C                        |       | B.1.367 |
| 30 | 12,2 | NI   | NI   | Other SARS-CoV-2 variants      | 3179 | 20A.EU2                    |       | B.1.160 |
| 31 | 14,4 | NI   | NI   | Other SARS-CoV-2 variants      | 3564 | 21D (Marseille484K.V3-21D) | Eta   | B.1.525 |
