# Supplementary figures and images for: Monitoring the Circulation of SARS-CoV-2 Variants by Genomic Analysis of Wastewater in Marseille, South-East France
Source: MDPI journal article supplement (doi:10.3390/pathogens10081042), 2021-08-17

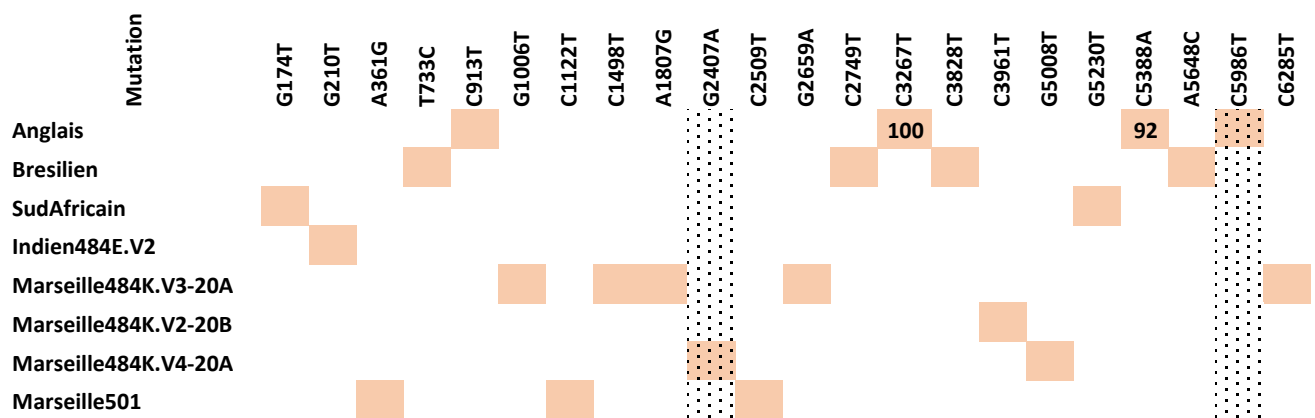

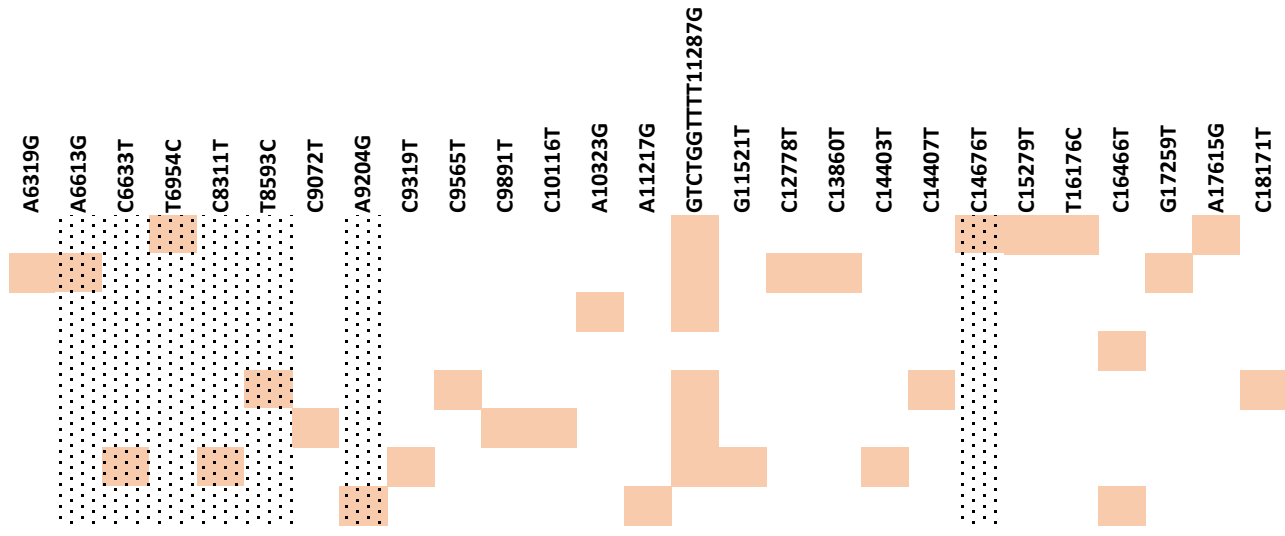

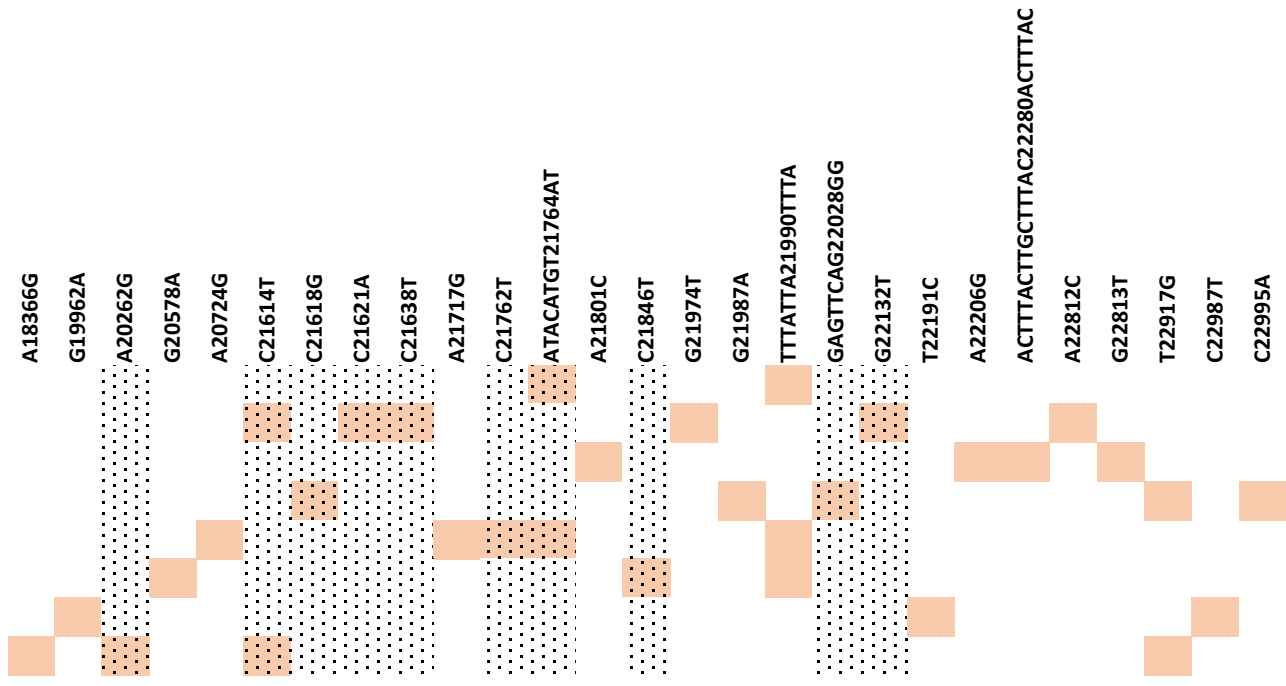

[illegible]

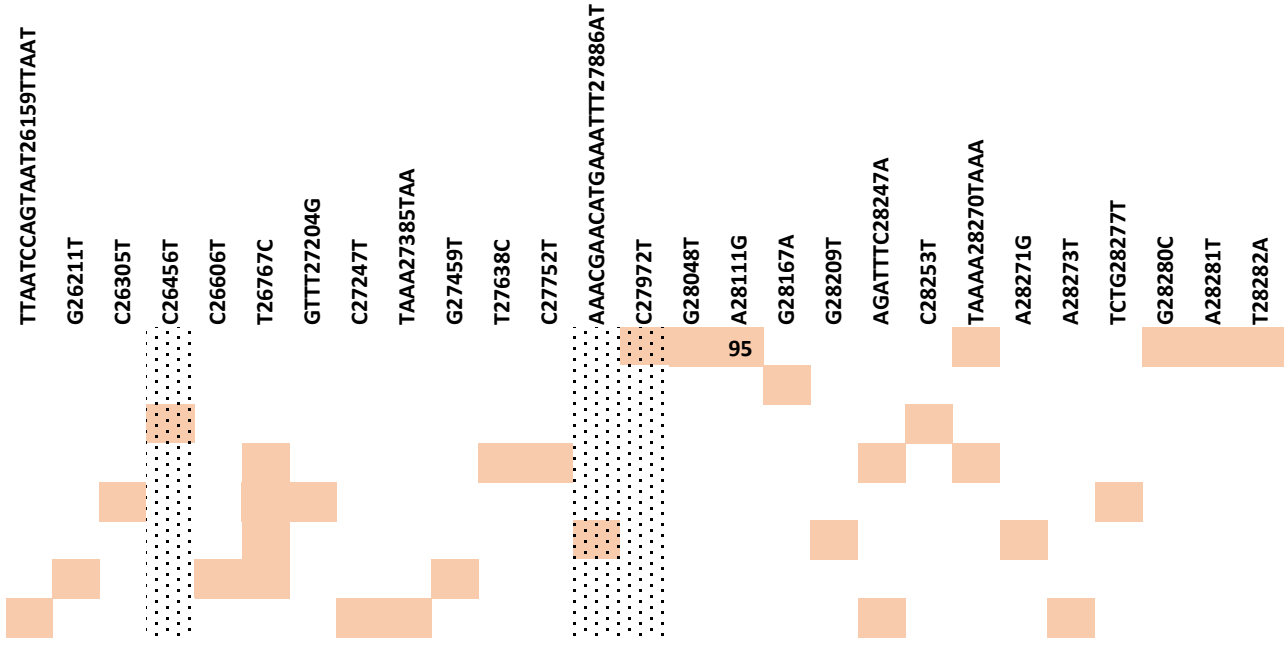

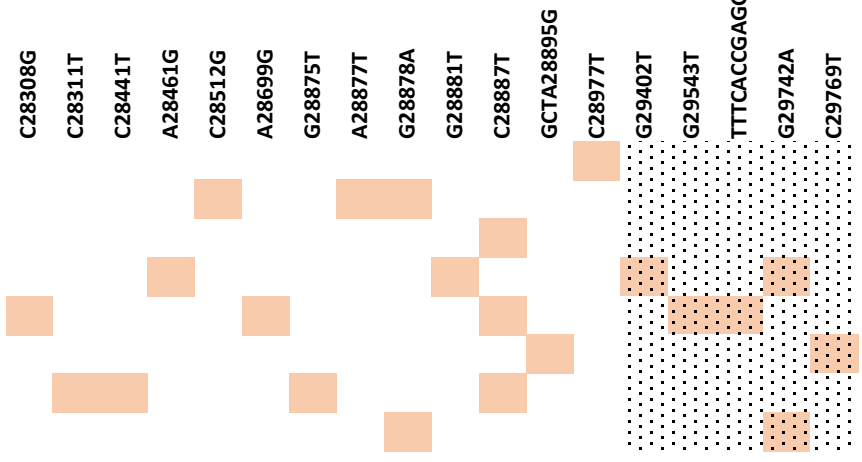

Supplement: s1 [file s1]
